# Supplementary material for: Resveratrol and ω-3 PUFAs Promote Human Macrophage Differentiation and Function
Source: MDPI journal article supplement (doi:10.3390/biomedicines10071524), 2022-06-28
Supplement: s1 [file s1]

## Supplementary Information

Figure S1. Cytofluoremetric analysis of freshly isolated adherent PBMC for surface determinants. Macrophages/ monocytes: red; lymphocytes: green; 'intermediate cells (FCS/SSC between lymphocytes and macrophages/ monocytes): pink.

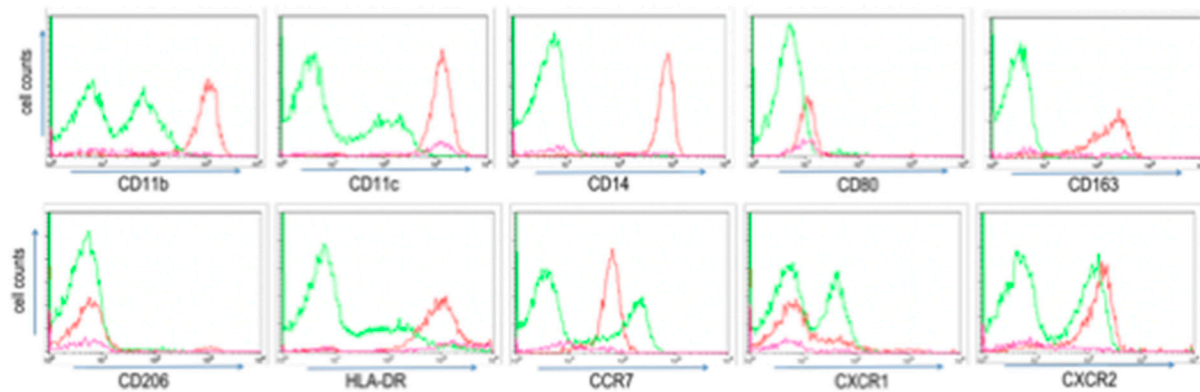

Figure S2. Production of PGE<sub>2</sub> by in vitro differentiated macrophages from PBMC.

Adherent cells isolated from peripheral blood were cultured in basal medium (M0 cells), GM-CSF (M1 cells) and M-CSF (M2) for M1 and M2 differentiation, respectively, for 7 days, followed by activation with LPS/IFN- $\gamma$  or IL-4/ IL-13 for 24 h. Mean values  $\pm$  standard deviation [pg/mL] of triplicates of a representative experiment (of four performed) are given. \*\*  $p < 0.01$ , \*  $p < 0.05$  (versus activated cells).

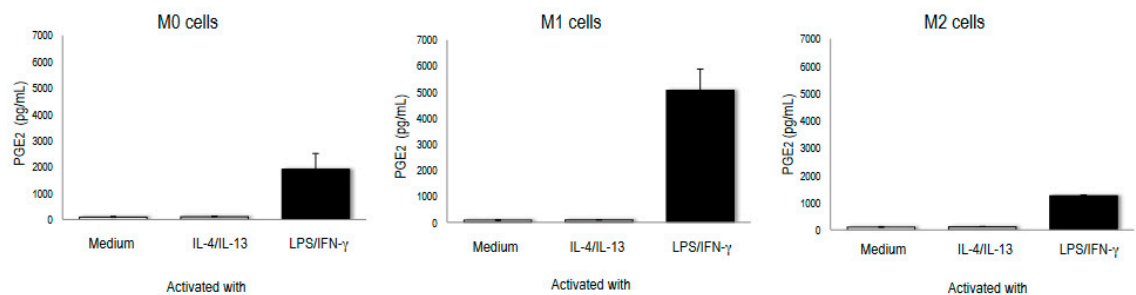

Table S1. Peak Fluorescence Intensity (PFI) data related to Figure 3 of original article *Resveratrol and omega-3 PUFAs Promote Human Macrophage Differentiation and Function* <sup>\*)</sup>

\*\*) p < 0.01, \* p 0.01 < 0.05; NS = non-significant

| Surface Determinant | Macrophage population | Color-code in Figure 3 | PFI  | -/+ st. dev. | M0 vs M1                                                                           | M0 vs M2                                                                            |
|---------------------|-----------------------|------------------------|------|--------------|------------------------------------------------------------------------------------|-------------------------------------------------------------------------------------|
| CD11b               | M0                    | red                    | 320  | 52           |  |  |
|                     | M1                    | green                  | 1280 | 234          |                                                                                    |                                                                                     |
|                     | M2                    | blue                   | 308  | 34           |                                                                                    |                                                                                     |
| CD14                | M0                    | red                    | 292  | 121          |  |  |
|                     | M1                    | green                  | 48   | 34           |                                                                                    |                                                                                     |
|                     | M2                    | blue                   | 409  | 122          |                                                                                    |                                                                                     |
| CD209               | M0                    | red                    | 385  | 109          |  |  |
|                     | M1                    | green                  | 250  | 23           |                                                                                    |                                                                                     |
|                     | M2                    | blue                   | 6    | 4            |                                                                                    |                                                                                     |
| CD274               | M0                    | red                    | 112  | 23           |  |  |
|                     | M1                    | green                  | 120  | 56           |                                                                                    |                                                                                     |
|                     | M2                    | blue                   | 81   | 5            |                                                                                    |                                                                                     |
| CCR7                | M0                    | red                    | 108  | 12           |  |  |
|                     | M1                    | green                  | 29   | 5            |                                                                                    |                                                                                     |
|                     | M2                    | blue                   | 76   | 10           |                                                                                    |                                                                                     |
| HLA-DR              | M0                    | red                    | 1998 | 201          |  |  |
|                     | M1                    | green                  | 1090 | 12           |                                                                                    |                                                                                     |
|                     | M2                    | blue                   | 1740 | 68           |                                                                                    |                                                                                     |

Table S2. Peak Fluorescence Intensity (PFI) data related to Figure 4 of original article *Resveratrol and omega-3 PUFAs Promote Human Macrophage Differentiation and Function* <sup>\*)</sup>

\*\* p < 0.01, \* p 0.01 < 0.05; NS = non-significant

|    | Surface Determinant | Treatment     | Color-code in Figure 4 | PFI  | -/+ st. dev. | none vs Resveratrol | none vs PUFAs |
|----|---------------------|---------------|------------------------|------|--------------|---------------------|---------------|
| M1 | CD14                | none          | black                  | 70   | 14           |                     |               |
|    |                     | resveratrol   | red                    | 313  | 23           |                     |               |
|    |                     | omega-3 PUFAs | green                  | 4    | 1            |                     |               |
|    | CD206               | none          | black                  | 1922 | 34           |                     |               |
|    |                     | resveratrol   | red                    | 8590 | 245          |                     |               |
|    |                     | omega-3 PUFAs | green                  | 1267 | 234          |                     |               |
|    | CD274               | none          | black                  | 100  | 12           |                     |               |
|    |                     | resveratrol   | red                    | 258  | 120          |                     |               |
|    |                     | omega-3 PUFAs | green                  | 69   | 41           |                     |               |
|    | HLA-DR              | none          | black                  | 523  | 56           |                     |               |
|    |                     | resveratrol   | red                    | 1304 | 202          |                     |               |
|    |                     | omega-3 PUFAs | green                  | 8967 | 299          |                     |               |
| M2 | Surface Determinant | Treatment     | Color-code in Figure 4 | PFI  | -/+ st. dev. |                     |               |
|    | CD14                | none          | black                  | 512  | 76           |                     |               |
|    |                     | resveratrol   | red                    | 387  | 112          |                     |               |
|    |                     | omega-3 PUFAs | green                  | 221  | 34           |                     |               |
|    | CD206               | none          | black                  | 2041 | 38           |                     |               |
|    |                     | resveratrol   | red                    | 348  | 152          |                     |               |
|    |                     | omega-3 PUFAs | green                  | 1756 | 76           |                     |               |
|    | CD274               | none          | black                  | 107  | 12           |                     |               |
|    |                     | resveratrol   | red                    | 246  | 19           |                     |               |
|    |                     | omega-3 PUFAs | green                  | 84   | 54           |                     |               |
|    | HLA-DR              | none          | black                  | 536  | 82           |                     |               |
|    |                     | resveratrol   | red                    | 8939 | 431          |                     |               |
|    |                     | omega-3 PUFAs | green                  | 2036 | 74           |                     |               |

\*) PFI refers to the fluorescence intensity at the peak of the curves indicated in Figure 3 and Figure 4
